# Supplementary material for: Malnutrition in all its forms and associated factors affecting the nutritional status of adult rural population in Bangladesh: results from a cross-sectional survey
Source: PubMed Central journal article supplement — BMJ Open. 2021 Oct 27;11(10):e051701. doi: 10.1136/bmjopen-2021-051701 (PMC8552130; doi:10.1136/bmjopen-2021-051701), 2021-10-27
Supplement: bmjopen-2021-051701supp001.pdf [file bmjopen-2021-051701supp001.pdf]

**Supplementary table 1: Univariate analysis ( $\chi^2$ -test) between the nutritional status (underweight, normal weight, overweight/obese) and the sociodemographic characteristics and behavioral risk factors of respondents (N = 11,064)**

| Variables                                  | Categories      | Nutritional status (%) |               |                   | $\chi^2$ -value | P-value |
|--------------------------------------------|-----------------|------------------------|---------------|-------------------|-----------------|---------|
|                                            |                 | Underweight            | Normal weight | Overweight/ obese |                 |         |
| Age                                        | < 45 years      | 17.9                   | 60.4          | 21.7              | 72.4            | <0.001* |
|                                            | $\geq$ 45 years | 24.0                   | 57.9          | 18.0              |                 |         |
| Sex                                        | Male            | 24.7                   | 62.5          | 12.8              | 187.5           | <0.001* |
|                                            | Female          | 19.0                   | 57.5          | 23.5              |                 |         |
| Education                                  | Illiterate      | 26.8                   | 59.2          | 14.0              | 210.2           | <0.001* |
|                                            | Literate        | 17.6                   | 59.2          | 23.2              |                 |         |
| Marital status                             | Never married   | 29.3                   | 61.6          | 9.1               | 77.4            | <0.001* |
|                                            | Ever married    | 20.3                   | 59.0          | 20.7              |                 |         |
| Occupation                                 | Housewife       | 18.1                   | 57.3          | 24.6              | 239.8           | <0.001* |
|                                            | Unemployed      | 31.2                   | 57.6          | 11.2              |                 |         |
|                                            | Income group    | 22.4                   | 62.3          | 15.3              |                 |         |
| Physical activity                          | Inactive        | 25.1                   | 57.3          | 17.6              | 27.8            | <0.001* |
|                                            | Active          | 20.0                   | 59.6          | 20.4              |                 |         |
| Red meat intake                            | Yes             | 17.9                   | 58.2          | 23.9              | 45.2            | <0.001* |
|                                            | No              | 21.9                   | 59.5          | 18.6              |                 |         |
| Added salt intake                          | Yes             | 23.2                   | 59.3          | 17.5              | 100.7           | <0.001* |
|                                            | No              | 17.1                   | 58.9          | 24.0              |                 |         |
| Inadequate intake of fruits and vegetables | Yes             | 21.4                   | 59.5          | 19.0              | 17.4            | <0.001* |
|                                            | No              | 19.4                   | 58.1          | 22.5              |                 |         |

Underweight, BMI less than 18.5 kg/m<sup>2</sup>; Normal weight, BMI is 18.5 – 25.0 kg/m<sup>2</sup>; Overweight, BMI is 25.0 – 29.9 kg/m<sup>2</sup>; Obese, BMI is over 30.0 kg/m<sup>2</sup>

\*Significant at the threshold of P-value < 0.05
