# Supplementary material for: Malnutrition in all its forms and associated factors affecting the nutritional status of adult rural population in Bangladesh: results from a cross-sectional survey
Source: PubMed Central journal article supplement — BMJ Open. 2021 Oct 27;11(10):e051701. doi: 10.1136/bmjopen-2021-051701 (PMC8552130; doi:10.1136/bmjopen-2021-051701), 2021-10-27
Supplement: bmjopen-2021-051701supp002.pdf [file bmjopen-2021-051701supp002.pdf]

Supplementary table 2: Sociodemographic characteristics of respondents, stratified by nutrition status and sex (N = 11,064)

| Sex        | Variable       | Category            | N                | Nutritional status % (95% CI) |                  |                  |               |
|------------|----------------|---------------------|------------------|-------------------------------|------------------|------------------|---------------|
|            |                |                     |                  | Underweight                   | Normal weight    | Overweight       | Obese         |
| Male       | Age (years)    | <=30                | 670              | 27.2 (23.9–30.7)              | 63.1 (59.4–66.7) | 9.0 (7.0–11.4)   | 0.7 (0.3–1.8) |
|            |                | 31 to 40            | 712              | 18.1 (15.5–21.1)              | 66.7 (63.2–70.1) | 13.8 (11.4–16.5) | 1.4 (0.8–2.6) |
|            |                | 41 to 50            | 788              | 18.7 (16.1–21.5)              | 65.9 (62.5–69.1) | 14.1 (11.8–16.7) | 1.4 (0.8–2.5) |
|            |                | 51 to 60            | 792              | 24.6 (21.7–27.7)              | 62.4 (58.9–65.7) | 11.6 (9.6–14.0)  | 1.4 (0.8–2.5) |
|            |                | > 60                | 753              | 34.9 (31.6–38.4)              | 54.6 (51.0–58.1) | 8.8 (6.9–11.0)   | 1.7 (1.0–3.0) |
|            | Education      | No schooling        | 1137             | 31.9 (29.3–34.7)              | 59.5 (56.6–62.3) | 7.7 (6.2–9.3)    | 1.0 (0.5–1.7) |
|            |                | Primary             | 1052             | 26.9 (24.3–29.7)              | 63.7 (60.7–66.5) | 8.4 (6.8–10.2)   | 1.0 (0.6–1.9) |
|            |                | Secondary and above | 1526             | 17.7 (15.9–19.7)              | 64.0 (61.5–66.3) | 16.5 (14.7–18.5) | 1.8 (1.3–2.6) |
|            | Marital status | Never married       | 463              | 28.9 (25.0–33.2)              | 62.6 (58.1–66.9) | 7.6 (5.5–10.4)   | 0.9 (0.3–2.3) |
|            |                | Ever married        | 3252             | 24.0 (22.6–25.5)              | 62.5 (60.8–64.1) | 12.1 (11.0–13.2) | 1.4 (1.1–1.9) |
|            | Occupation     | Unemployed          | 550              | 31.6 (27.9–35.6)              | 58.5 (54.4–62.6) | 8.4 (6.3–11.0)   | 1.5 (0.7–2.9) |
|            |                | Service holder      | 223              | 9.4 (6.2–14.0)                | 63.7 (57.1–69.7) | 24.7 (19.4–30.8) | 2.2 (0.9–5.3) |
|            |                | Farmer              | 1303             | 32.0 (29.5–34.6)              | 61.3 (58.6–63.9) | 6.1 (4.9–7.5)    | 0.6 (0.3–1.2) |
|            |                | Self-employed       | 1549             | 17.9 (16.1–19.9)              | 65.3 (62.9–67.6) | 15.2 (13.5–17.0) | 1.7 (1.1–2.5) |
|            |                | Housewife           | 90               | 30.0 (21.4–40.3)              | 53.3 (43.0–63.4) | 13.3 (7.7–22.1)  | 3.3 (1.1–9.9) |
| Female     | Age (years)    | <=30                | 1514             | 22.1 (20.1–24.3)              | 60.3 (57.8–62.7) | 14.7 (13.0–16.5) | 2.9 (2.2–3.9) |
|            |                | 31 to 40            | 1707             | 12.8 (11.3–14.5)              | 56.5 (54.1–58.8) | 24.1 (22.1–26.2) | 6.6 (5.5–7.9) |
|            |                | 41 to 50            | 1694             | 15.2 (13.6–17.0)              | 56.2 (53.8–58.5) | 22.8 (20.9–24.9) | 5.7 (4.7–6.9) |
|            |                | 51 to 60            | 1305             | 19.9 (17.8–22.2)              | 58.5 (55.8–61.1) | 17.5 (15.6–19.7) | 4.1 (3.1–5.3) |
|            |                | > 60                | 1129             | 29.0 (26.4–31.7)              | 56.2 (53.2–59.0) | 11.9 (10.1–13.9) | 3.0 (2.2–4.2) |
|            | Education      | No schooling        | 2832             | 24.8 (23.2–26.4)              | 59.1 (57.3–60.9) | 13.2 (12.0–14.5) | 2.9 (2.4–3.6) |
|            |                | Primary             | 2119             | 16.2 (14.7–17.9)              | 57.0 (54.8–59.1) | 21.8 (20.1–23.7) | 5.0 (4.1–6.0) |
|            |                | Secondary and above | 2398             | 14.8 (13.4–16.2)              | 56.1 (54.1–58.1) | 22.7 (21.1–24.4) | 6.4 (5.5–7.4) |
|            | Marital status | Never married       | 308              | 29.9 (25.0–35.2)              | 60.1 (54.5–65.4) | 7.5 (5.0–11.0)   | 2.6 (1.3–5.1) |
|            |                | Ever married        | 7041             | 18.6 (17.7–19.5)              | 57.4 (56.2–58.5) | 19.3 (18.4–20.3) | 4.7 (4.3–5.3) |
| Occupation | Unemployed     | 507                 | 30.8 (26.9–34.9) | 56.6 (52.2–60.9)              | 9.1 (6.9–11.9)   | 3.6 (2.2–5.6)    |               |

---

|                |      |                  |                  |                  |                |
|----------------|------|------------------|------------------|------------------|----------------|
| Service holder | 84   | 15.5 (9.2–24.9)  | 58.3 (47.5–68.4) | 21.4 (13.9–31.5) | 4.8 (1.8–12.1) |
| Farmer         | 50   | 28.0 (17.2–42.0) | 68.0 (53.8–79.5) | 2.0 (0.3–13.1)   | 2.0 (0.3–13.1) |
| Self-employed  | 867  | 19.7 (17.2–22.5) | 58.0 (54.7–61.3) | 17.9 (15.5–20.6) | 4.4 (3.2–6.0)  |
| Housewife      | 5841 | 17.9 (16.9–18.9) | 57.4 (56.1–58.7) | 19.9 (18.9–21.0) | 4.8 (4.3–5.4)  |

---
